# Supplementary material
Source: publisher figshare collection journal article supplement (https://frontiersin.figshare.com/ndownloader/files/30967672)
Supplement: Supplementary file [file 30967672]

## ***Supplementary Material A***

### **A.1 Development of the biodegradation assays for azo dyes and whitener**

First, the influence of centrifugation on sedimentation of dyes was tested by determining the absorption or emission intensity of the dyes before and after centrifugation (12,000×g, 5 min). For whitener, excitation at 315 nm showed a maximum wavelength emission at 440 nm, as for 4,4'-diamino-2,2'-stilbenedisulfonic acid (DSDS), and the coefficient between the fluorescence intensity after and before centrifugation ( $I_{\text{cent}}/I$ ) was 98%. For black dye an absorption decrease of 4% at both peak maxima was recorded, for red, blue and direct blue 15 dye (DB15) no decrease in absorption was detected and yellow dye showed a decrease of 50%. Calibration curves for all tests in liquid media were generated for molar concentrations at  $\lambda_{\text{max}}$  and the volume of liquid in microplates was kept constant to ensure accurate absorbance measurements. To quantitatively determine the amount of unhydrolyzed dye by measuring the absorption of supernatants, the tests with NB in microplates had to be completed in a maximum of three days. To determine the activities of the most active bacteria, initially, relative standard error between the triplicates was maximum 3%. During incubation the microtiter plates were covered with sterile lids and were packed in bags to prevent evaporation. Wet paper was inserted into the bags to maintain a constant humidity.

### **References**

- Hočevár, B., Grilc, M., and Likozar, B. (2019). Aqueous Dehydration, Hydrogenation, and Hydrodeoxygenation Reactions of Bio-Based Mucic Acid over Ni, NiMo, Pt, Rh, and Ru on Neutral or Acidic Catalyst Supports. *Catalysts*, 9, 286-306. <https://doi:10.3390/catal9030286>
- Marshall, C. J., and Kunkle, C. A. (1992). Mineral dye pigments. U.S. Patent No 5,106, 421.

**Supplementary Table A.1** Whitewater analysis of the wood-free paper mill within a period of two months with average, minimum and maximum values.

| <b>t (day)<sup>a</sup></b> | <b>COD<br/>(mg/L)</b> | <b>DOC<br/>(mg/L)</b> | <b>BOD<sub>5</sub><br/>(mg/L)</b> | <b>HCO<sub>3</sub><sup>-</sup><br/>(mg/L)</b> | <b>Cl<sup>-</sup><br/>(mg/L)</b> | <b>NO<sub>3</sub><sup>-</sup><br/>(mg/L)</b> | <b>SO<sub>4</sub><sup>2-</sup><br/>(mg/L)</b> | <b>Na<sup>+</sup><br/>(mg/L)</b> | <b>K<sup>+</sup><br/>(mg/L)</b> | <b>NH<sub>4</sub><sup>+</sup><br/>(mg/L)</b> | <b>Ca<sup>2+</sup><br/>(mg/L)</b> | <b>Mg<sup>2+</sup><br/>(mg/L)</b> | <b>pH</b>  |
|----------------------------|-----------------------|-----------------------|-----------------------------------|-----------------------------------------------|----------------------------------|----------------------------------------------|-----------------------------------------------|----------------------------------|---------------------------------|----------------------------------------------|-----------------------------------|-----------------------------------|------------|
| <b>AVG</b>                 | <b>303</b>            | <b>94</b>             | <b>166</b>                        | <b>153</b>                                    | <b>40</b>                        | <b>8</b>                                     | <b>179</b>                                    | <b>78</b>                        | <b>0</b>                        | <b>2</b>                                     | <b>59</b>                         | <b>15</b>                         | <b>7.5</b> |
| <b>MIN</b>                 | <b>190</b>            | <b>31</b>             | <b>80</b>                         | <b>50</b>                                     | <b>25</b>                        | <b>1.6</b>                                   | <b>109</b>                                    | <b>62</b>                        | <b>0</b>                        | <b>1.7</b>                                   | <b>41</b>                         | <b>10</b>                         | <b>6.8</b> |
| <b>MAX</b>                 | <b>500</b>            | <b>175</b>            | <b>254</b>                        | <b>269</b>                                    | <b>62</b>                        | <b>15</b>                                    | <b>309</b>                                    | <b>95</b>                        | <b>1.5</b>                      | <b>3.5</b>                                   | <b>88</b>                         | <b>29</b>                         | <b>8.2</b> |
| <b>-1</b>                  | 232                   | 134                   | 158                               | 165                                           | 49                               | 7.8                                          | 183                                           | 78                               | 0                               | 2.5                                          | 52                                | 16                                | 7          |
| <b>1</b>                   | 214                   | 54                    |                                   | 130                                           | 34                               | 15                                           | 175                                           | 62                               | 0                               |                                              | 54                                | 16                                | 7.1        |
| <b>2</b>                   | 278                   | 52                    | 80                                | 114                                           | 25                               | 13                                           | 309                                           | 67                               | 0                               |                                              | 88                                | 17                                | 7.5        |
| <b>5</b>                   | 190                   | 36                    |                                   | 111                                           | 26                               | 7.4                                          | 267                                           | 90                               | 0                               | 2                                            | 78                                | 13                                | 7.2        |
| <b>6</b>                   | 210                   | 31                    |                                   | 90                                            | 26                               | 8.4                                          | 274                                           | 86                               | 0                               | 1.8                                          | 79                                | 16                                | 7.5        |
| <b>7</b>                   | 200                   | 37                    |                                   | 50                                            | 26                               | 9.1                                          | 233                                           | 70                               | 0                               |                                              | 59                                | 14                                | 6.8        |
| <b>8</b>                   | 268                   | 77                    | 109                               | 141                                           | 36                               | 9.1                                          | 233                                           | 95                               | 0                               | 2.2                                          | 67                                | 14                                | 7.5        |
| <b>9</b>                   | 320                   | 91                    |                                   | 156                                           | 45                               | 3.7                                          | 132                                           | 66                               | 0                               |                                              | 43                                | 17                                | 7.3        |
| <b>12</b>                  | 252                   | 78                    |                                   | 123                                           | 39                               | 5.7                                          | 117                                           | 66                               | 0                               | 2.5                                          | 45                                | 12                                | 7.6        |
| <b>13</b>                  | 356                   | 95                    |                                   | 144                                           | 36                               | 7.7                                          | 156                                           | 78                               | 0                               |                                              | 52                                | 13                                | 7.6        |
| <b>14</b>                  | 300                   | 120                   | 178                               | 184                                           | 46                               | 8.2                                          | 125                                           | 85                               | 0                               | 2.7                                          | 51                                | 13                                | 7.4        |
| <b>15</b>                  | 284                   | 105                   |                                   | 180                                           | 41                               | 4                                            | 138                                           | 76                               | 0                               | 1.7                                          | 64                                | 14                                | 7.8        |
| <b>16</b>                  | 345                   | 114                   |                                   | 170                                           | 44                               | 6                                            | 109                                           | 75                               | 0                               | 2                                            | 41                                | 10                                | 7.7        |
| <b>21</b>                  | 362                   | 128                   |                                   | 141                                           | 36                               | 6.2                                          | 150                                           | 76                               | 0                               | 2                                            | 60                                | 13                                | 7.5        |
| <b>22</b>                  | 500                   | 175                   | 180                               | 168                                           | 44                               | 2.3                                          | 116                                           | 76                               | 0                               | 2.1                                          | 50                                | 11                                | 7.3        |
| <b>24</b>                  | 243                   | 74                    |                                   | 167                                           | 27                               | 4.3                                          | 122                                           | 76                               | 0                               |                                              | 60                                | 12                                | 7.4        |
| <b>28</b>                  | 448                   | 128                   | 183                               | 146                                           | 57                               | 13                                           | 235                                           | 84                               | 0                               | 1.7                                          | 61                                | 16                                | 8.2        |
| <b>31</b>                  | 393                   | 120                   | 254                               | 253                                           | 52                               | 11.1                                         | 171                                           | 82                               | 0                               | 2.5                                          | 52                                | 14                                | 7.4        |
| <b>59</b>                  | 371                   | 145                   | 183                               | 269                                           | 62                               | 1.6                                          | 163                                           | 87                               | 1.5                             |                                              | 71                                | 29                                | 8.2        |

<sup>a</sup> ... -1 refers to one day before cleaning of the whitewater system and days 1-59 to sampling after restarting of the system.

**Supplementary Table A.2.** Organic additives used as carbon sources with abbreviation, their assumed shares in the industrial wood-free paper fiber slurry, calculated according to production sheets of four different paper grades of a wood-free paper mill and chemical structure with molar mass to calculate the calibration curves; for dyes maximum wavelength absorption or excitation/emission and dye intensity before and after centrifugation at 12,000×g.

| Abbr. | Share (%) | Chemical structure                                                                                                                                                                                                                                                                                                                                                                                                                                                       |
|-------|-----------|--------------------------------------------------------------------------------------------------------------------------------------------------------------------------------------------------------------------------------------------------------------------------------------------------------------------------------------------------------------------------------------------------------------------------------------------------------------------------|
| CE    | 4         | Microcrystalline cellulose (VWR, USA) CAS 9004-34-6; M (C <sub>12</sub> H <sub>22</sub> O <sub>11</sub> )=342 g/mol (monomeric unit)                                                                                                                                                                                                                                                                                                                                     |
| CST   | 0.4       | Cationic potato starch, degree of derivatization 0.04, based on integrals in <sup>1</sup> H-NMR; M(C <sub>6</sub> H <sub>10</sub> O <sub>5</sub> )=162 g/mol (monomeric unit)                                                                                                                                                                                                                                                                                            |
| RES   | 0.4       | Rosin, CAS No 8050-09-7; contains abietic and pimeric type resin acids; M(C <sub>20</sub> H <sub>30</sub> O <sub>2</sub> )=303 g/mol                                                                                                                                                                                                                                                                                                                                     |
| AKD   | 0.18      | Alkyl ketene dimers: 2-oxetanone, 3-C12-16-alkyl-4-C13-17-alkylidene derivatives, CAS No 84989-41-3; M=477 g/mol                                                                                                                                                                                                                                                                                                                                                         |
| WH    | 0.10      | Whitening agent; fluorescent brightening agent; tetrasodium 2,2'-ethene-1,2-diylbis[5-({4-[bis(2-hydroxyethyl)amino]-6-[(4-sulfonatophenyl)amino]-1,3,5-triazin-2-yl} amino)benzenesulfonate]; spectral properties similar to 4,4'-diamino-2,2'-stilbenedisulfonic acid; M(C <sub>42</sub> H <sub>44</sub> N <sub>12</sub> Na <sub>4</sub> O <sub>16</sub> S <sub>4</sub> )=1193 g/mol; excitation at 315 nm with maximum emission at 430 nm; I <sub>cent</sub> /I = 98% |
| NST   | 0.005     | Native soluble starch, CAS 9005-25-8; (2R,SS,4S,5R,6R)-2-(hydroxy methyl)-6-[(2R(xy-oxane-3,4,5-triol,3S,4R,5R,6S)-4,5,6-tri hydroxy-2-(hydroxymethyl)oxan-3-y)oxy-oxane-3,4,5-triol; M(C <sub>6</sub> H <sub>10</sub> O <sub>5</sub> )=162 g/mol (monomeric unit)                                                                                                                                                                                                       |
| ST    | /         | Starch, soluble (Sigma Aldrich, USA) CAS 9005-84-9; M(C <sub>6</sub> H <sub>10</sub> O <sub>5</sub> )=162 g/mol (monomeric unit)                                                                                                                                                                                                                                                                                                                                         |
| RED   | 0.005     | Direct red dye 253 (Marshall 1992), CAS 142985-51-1: Dinatrium;(3E)-7-[[4,6-bis(2-hydroxyethylamino)-1,3,5-triazin-2-yl]amino]-4-oxo-3-[[4-[(4-sulfonatophenyl)diazenyl]phenyl] hydrazinylidene] naphthalene-2-sulfonate; M(C <sub>29</sub> H <sub>26</sub> N <sub>10</sub> Na <sub>2</sub> O <sub>9</sub> S <sub>2</sub> )=769 g/mol; λ <sub>max</sub> =510 nm; I <sub>cent</sub> /I = 100%                                                                             |
| BLU   | 0.005     | Blue dye, similar biodegradation to direct blue 15, CAS No. 2429-74-5. To evaluate the structural similarity of the dye BLU to DB15, cometabolism tests on 44 selected strains were compared for the biodegradation of BLU and DB15 dye in NB. After 72 h similar discoloration patterns were found. Direct blue 15 is 2,3,3'-[(3,3'-dimethoxy-4,4'-                                                                                                                     |

|     |        |                                                                                                                                                                                                                                                                                                                                                                              |
|-----|--------|------------------------------------------------------------------------------------------------------------------------------------------------------------------------------------------------------------------------------------------------------------------------------------------------------------------------------------------------------------------------------|
|     |        | biphenylene)bis(azo)]bis [5-amino-4-hydroxy-tetrasodium salt]; $M_{DB15}(C_{34}H_{28}N_6NaO_{16}S_4)=927$ g/mol; $\lambda_{max}$ BLU=560 nm; $\lambda_{max}$ DB15=600 nm; $I_{cent}/I = 100\%$                                                                                                                                                                               |
| BLA | 0.003  | Black dye HM 2482, CAS No. 89857-06-7; 1,3'-bipyridinium,5'-[[4-[[7-[(1',2'-dihydro-6'-hydroxy-3,4-dimethyl-2'-oxo[1,3'-bipyridinium]-5'-yl)azo]-1-hydroxy-3-sulpho-2-naphthalenyl]azo]phenyl]azo]-1'-[3-(dimethylamino)propyl]-1',2'-oxo-, salt with 2-hydroxypropanoic acid; $M(C_{50}H_{57}N_{11}O_{14}S_4)=1068$ g/mol; $\lambda_{max}=440, 590$ nm; $I_{cent}/I = 96\%$ |
| Y   | 0.003  | Yellow dye containing C; H; N; O; S; stilbene derivative; $M^a=180$ g/mol; $\lambda_{max}=400$ nm; $I_{cent}/I = 50\%$                                                                                                                                                                                                                                                       |
| PVA | <0.001 | Polyvinyl alcohol, CAS 9002-89-5; $M(C_2H_4O)=44$ g/mol (monomeric unit)                                                                                                                                                                                                                                                                                                     |
| LX  | <0.001 | Latex dispersion, styrene-butadiene copolymer; $M(C_{12}H_{14})=158$ g/mol (monomeric unit)                                                                                                                                                                                                                                                                                  |

<sup>a</sup> Unknown structure, molar weight taken for glucose.

**Supplementary Table A.3.** Protocols with inoculum preparation and composition of media.

| Test                                       |  | Inoculum preparation                                                                                                                                                                                                        | Carbon source | Selection media                                              |
|--------------------------------------------|--|-----------------------------------------------------------------------------------------------------------------------------------------------------------------------------------------------------------------------------|---------------|--------------------------------------------------------------|
| Biodegradation assays<br>(see Section 2.3) |  | Colony of the isolate on NB agar was picked and transferred to a circle on selection media. Incubation was at 25 °C for 7-13 days.                                                                                          | starch        | M9 10 g/L ST<br>M9 10 g/L CST<br>M9 10 g/L NST               |
|                                            |  |                                                                                                                                                                                                                             | CE            | M9 5 g/L CE                                                  |
|                                            |  |                                                                                                                                                                                                                             | RES           | M9 0.25 g/L RES                                              |
|                                            |  |                                                                                                                                                                                                                             | AKD           | M9 0.25 g/L AKD                                              |
|                                            |  |                                                                                                                                                                                                                             | PVA           | M9 5 g/L PVA                                                 |
|                                            |  |                                                                                                                                                                                                                             | LX            | M9 0.25 g/L LX                                               |
|                                            |  | Colony of the isolate on NB agar was picked and transferred into M9 media with 47 mg/L of appropriate dye or whitener. After incubation at 25 °C for 3 days 10 µL of the culture was transferred into the selection medium. | BLU           | NB + 6 mg/L BLU                                              |
|                                            |  |                                                                                                                                                                                                                             | RED           | NB + 15 mg/L RED                                             |
|                                            |  |                                                                                                                                                                                                                             | BLA           | NB + 57 mg/L BLA                                             |
|                                            |  |                                                                                                                                                                                                                             | WH            | M9 <sub>Glc</sub> + 0.9 g/L WH; supernatant 20-times diluted |

|                                                                           |                                                                                                                                                                                                                                                                                                                                                                                        |                       |                                                                                 |
|---------------------------------------------------------------------------|----------------------------------------------------------------------------------------------------------------------------------------------------------------------------------------------------------------------------------------------------------------------------------------------------------------------------------------------------------------------------------------|-----------------------|---------------------------------------------------------------------------------|
|                                                                           |                                                                                                                                                                                                                                                                                                                                                                                        | Y                     | M9 95 mg/L yellow dye and M9 47 mg/L glucose                                    |
| Time-dependent degradation determination                                  | A colony was transferred into corresponding M9 media with 47 mg/L of appropriate dye or whitener. After incubation at 25 °C for 3 days 10 µL of the culture was transferred into the selection medium.                                                                                                                                                                                 | RED                   | NB + 13 mg/L RED                                                                |
|                                                                           |                                                                                                                                                                                                                                                                                                                                                                                        | BLU                   | NB + 10 mg/L BLU                                                                |
|                                                                           |                                                                                                                                                                                                                                                                                                                                                                                        | WH                    | M9 <sub>Glc</sub> + 0.5 g/L WH; supernatant 20-times diluted                    |
| Tests for the repertoire of carbon source usage ( <i>see</i> Section 2.7) | A colony was transferred into M9 <sub>Glc</sub> for 3 days at 25 °C. 10 µL of the culture was transferred into the selection medium.                                                                                                                                                                                                                                                   | CST                   | M9 0.5 g/L CST                                                                  |
|                                                                           |                                                                                                                                                                                                                                                                                                                                                                                        | ST                    | M9 0.5 g/L ST                                                                   |
|                                                                           |                                                                                                                                                                                                                                                                                                                                                                                        | AKD                   | M9 4 g/L AKD                                                                    |
|                                                                           |                                                                                                                                                                                                                                                                                                                                                                                        | RED                   | M9 <sub>Glc</sub> + 5 mg/L RED                                                  |
|                                                                           |                                                                                                                                                                                                                                                                                                                                                                                        | BLU                   | M9 <sub>Glc</sub> + 5 mg/L BLU                                                  |
|                                                                           |                                                                                                                                                                                                                                                                                                                                                                                        | WH                    | M9 <sub>Glc</sub> + 5 mg/L WH                                                   |
|                                                                           |                                                                                                                                                                                                                                                                                                                                                                                        | BLU                   | NB + 5 mg/L BLU                                                                 |
|                                                                           |                                                                                                                                                                                                                                                                                                                                                                                        | CE                    | 20 mL / plate; M9 agar with 5 g/L CE                                            |
|                                                                           |                                                                                                                                                                                                                                                                                                                                                                                        | CST                   | 15 mL / plate, M9 agar with 5 g/L CST                                           |
|                                                                           |                                                                                                                                                                                                                                                                                                                                                                                        | AKD                   | 20 mL / plate, M9 agar with 0.25 g/L AKD                                        |
| <i>In vitro</i> co-culturing test ( <i>see</i> Section 2.8)               | The growth of the six selected isolates was calibrated with determining cfu vs. OD <sub>600</sub> . Overnight culture was harvested in NB, cleared three times in 9 g/L NaCl. OD <sub>600</sub> was measured and a calibration curve was generated. The amount of volume was adjusted so that an equal initial sum of bacteria per each medium was added, i.e. 10 <sup>7</sup> CFU/mL. | RES                   | 20 mL / plate, M9 agar with 0.25 g/L RES                                        |
|                                                                           |                                                                                                                                                                                                                                                                                                                                                                                        | synthetic whitewater  | M9 (CST, PVA, RES, DB15); in the ratio CST : PVA : RES : DB15 = 1 : 1 : 1 : 0.5 |
|                                                                           |                                                                                                                                                                                                                                                                                                                                                                                        | industrial whitewater | M9 sterile whitewater                                                           |

|                                                  |                                                                                                                                                           |                       |                                                                                                                  |
|--------------------------------------------------|-----------------------------------------------------------------------------------------------------------------------------------------------------------|-----------------------|------------------------------------------------------------------------------------------------------------------|
| Proof of concept pilot test<br>(see Section 2.9) | Separate overnight cultures of the four bacteria of the consortium harvested in NB, cleared in 9 g/L NaCl, OD <sub>600</sub> measured and CFU calculated. | industrial whitewater | whitewater (unsterile) with added urea and H <sub>3</sub> PO <sub>4</sub> in the ratio COD : N : P = 100 : 5 : 1 |
|--------------------------------------------------|-----------------------------------------------------------------------------------------------------------------------------------------------------------|-----------------------|------------------------------------------------------------------------------------------------------------------|

**Supplementary Table A.4.** Selected isolates, active for the carbon source which they used during isolation with numbers of isolated bacteria per carbon source and results of biodegradation assays - C/C<sub>0</sub> and OD<sub>600</sub> values and test durations.

| Carbon source   | Number of isolates | Active isolate | C/C <sub>0</sub> (%) | OD <sub>600</sub> (/) ± RSE(%) | t (d) | C <sub>0</sub> (g/L) |
|-----------------|--------------------|----------------|----------------------|--------------------------------|-------|----------------------|
| Cationic starch | 44                 | CST37          | 75                   | /                              | 9     | 10                   |
|                 |                    | CST5           | 83                   | /                              |       |                      |
|                 |                    | CST10          | 83                   | /                              |       |                      |
|                 |                    | CST16          | 83                   | /                              |       |                      |
| Native starch   | 31                 | NST20          | 83                   | /                              | 11    | 10                   |
|                 |                    | NST22          | 87                   | /                              |       |                      |
| Starch, soluble | 35                 | ST12           | 72                   | /                              | 13    | 10                   |
|                 |                    | ST14           | 0                    | /                              |       |                      |
|                 |                    | ST16           | 0                    | /                              |       |                      |
| Resin           | 20                 | RES19          | 39                   | /                              | 7     | 0.25                 |
|                 |                    | RES9           | 75                   | /                              |       |                      |
|                 |                    | RES13          | 75                   | /                              |       |                      |
|                 |                    | RES15          | 75                   | /                              |       |                      |
| AKD             | 27                 | AKD4           | 51                   | /                              | 7     | 0.25                 |
|                 |                    | AKD5           | 46                   | /                              |       |                      |
|                 |                    | AKD13          | 75                   | /                              |       |                      |
|                 |                    | AKD19A         | 75                   | /                              |       |                      |
| PVA             | 20                 | PVA19          | 13                   | /                              | 7     | 5                    |
|                 |                    | PVA20          | 75                   | /                              |       |                      |
|                 |                    | PVA3           | 75                   | /                              |       |                      |
|                 |                    | PVA7           | 75                   | /                              |       |                      |
|                 |                    | PVA14          | 83                   | /                              |       |                      |
| Cellulose       | 22                 | CE12           | 0                    | /                              | 11    | 5                    |
|                 |                    | CE21           | 0                    | /                              |       |                      |
|                 |                    | CE7            | 81                   | /                              |       |                      |
|                 |                    | CE17           | 46                   | /                              |       |                      |
| Latex           | 23                 | LX13           | 31                   | /                              | 7     | 0.25                 |
|                 |                    | LX11           | 75                   | /                              |       |                      |
|                 |                    | LX8            | 84                   | /                              |       |                      |
| Red             | 20                 | RED14          | 0                    | 1.4±4                          | 2     | 0.015                |
|                 |                    | RED14A         | 20                   | 1.5±5                          |       |                      |
|                 |                    | RED15A         | 0                    | 1.0±9                          |       |                      |
|                 |                    | RED16B         | 11                   | 1.7±1                          |       |                      |
| Blue            | 27                 | BLU19          | 80                   | 0.6±7                          | 0.75  | 0.006                |
|                 |                    | BLU23          | 60                   | 1.6±5                          |       |                      |
| Whitener        | 12                 | WH8            | 59                   | 0.13±2                         | 3     | 0.9                  |

|        |    |       |    |        |     |       |
|--------|----|-------|----|--------|-----|-------|
| Yellow | 14 | WH5   | 99 | 0.04±7 | 7   | 0.095 |
|        |    | Y19   | 50 | 0.02±0 |     |       |
|        |    | Y17   | 53 | 0.02±1 |     |       |
|        |    | Y18   | 60 | 0.01±1 |     |       |
|        |    | Y14A  | 92 | 0.01±1 |     |       |
| Black  | 23 | BLA14 | 70 | 1.8±2  | 2.8 | 0.057 |
|        |    | BLA16 | 70 | 2.4±3  |     |       |
|        |    | BLA19 | 84 | 2.3±3  |     |       |

**Supplementary Table A.5.** AKD degradation confirmed by decrease in absorption and DOC removal, presented in C/C<sub>0</sub> values; the bacteria were inoculated for 62 h, initially 10<sup>8</sup> cfu/mL and C<sub>0</sub> 4 g/L.

| Isolate | C/C <sub>0</sub> (%) ± RSE (%) |       |
|---------|--------------------------------|-------|
|         | Absorption                     | DOC   |
| CST37   | 56±0                           | 62±0  |
| AKD4    | 57±0                           | 66±1  |
| RES19   | 56±0                           | 71±1  |
| BLA14   | 100±1                          | 100±1 |



**Supplementary Table A.6.** Results of the time-dependent activity of the most active red, blue and whitener dye degraders for the dye they used during isolation at 25 °C. Degradation is presented in percentages of C/C<sub>0</sub> values ± relative standard errors of triplicates. WH5 and WH8 after 165 h were 10<sup>9</sup> and 6×10<sup>10</sup> CFU/mL, respectively.

| Dye | Isolate       | C/C <sub>0</sub> λ <sub>max</sub> (%)±RSE (%) |       |       |       | OD <sub>600</sub> (/)±RSE (%) |        |         |        |        |
|-----|---------------|-----------------------------------------------|-------|-------|-------|-------------------------------|--------|---------|--------|--------|
|     |               | 24 h                                          | 48 h  | 72 h  | 165 h | 0 h                           | 24 h   | 48 h    | 72 h   | 165 h  |
| BLU | <b>BLU19</b>  | 40±3                                          | 19±1  | 13±2  | /     | 0.01±0                        | 0.6±1  | 0.9±2   | 0.9±1  | /      |
|     | <b>BLU23</b>  | 33±2                                          | 17±1  | 12±2  | /     | 0.01±0                        | 0.6±1  | 0.9±3   | 0.8±3  | /      |
| RED | <b>RED14</b>  | 6±3                                           | -7±2  | -15±1 | /     | 0.01±1                        | 0.1±1  | 1.3±4   | 1±0.5  | /      |
|     | <b>RED14A</b> | 103±0                                         | 2.8±3 | -14±3 | /     | 0.02±2                        | 0.1±6  | 1.1±2   | 1±8.5  | /      |
|     | <b>RED15A</b> | 60±3                                          | -16±0 | -16±1 | /     | 0.01±1                        | 0.6±6  | 1.1±1   | 1±8    | /      |
|     | <b>RED16B</b> | 65±4                                          | 35±2  | 68±6  | /     | 0.01±1                        | 0.1±7  | 1.6±5   | 1.8±5  | /      |
| WH  | <b>WH8</b>    | 98±3                                          | 92    | 85±2  | 75±3  | 0.00±1                        | 0.03±2 | 0.04±10 | 0.06±4 | 0.3±1  |
|     | <b>WH5</b>    | 96±2                                          | 95.5  | 95±2  | 84±7  | 0.00±0                        | 0.00±2 | 0.00±2  | 0.01±2 | 0.01±3 |

(A)

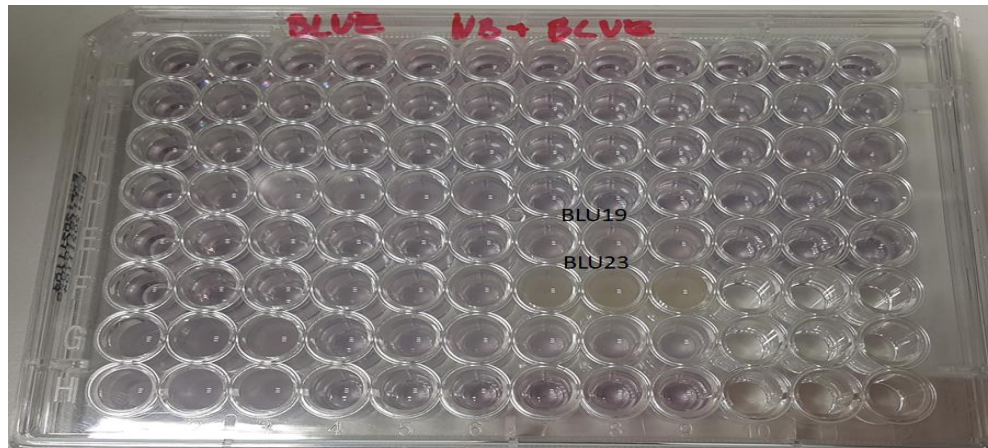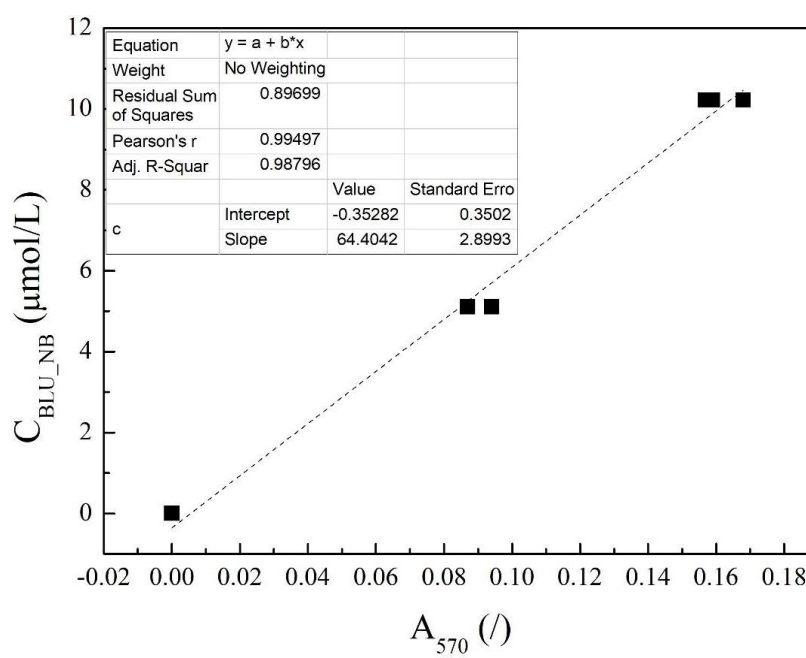

(B)

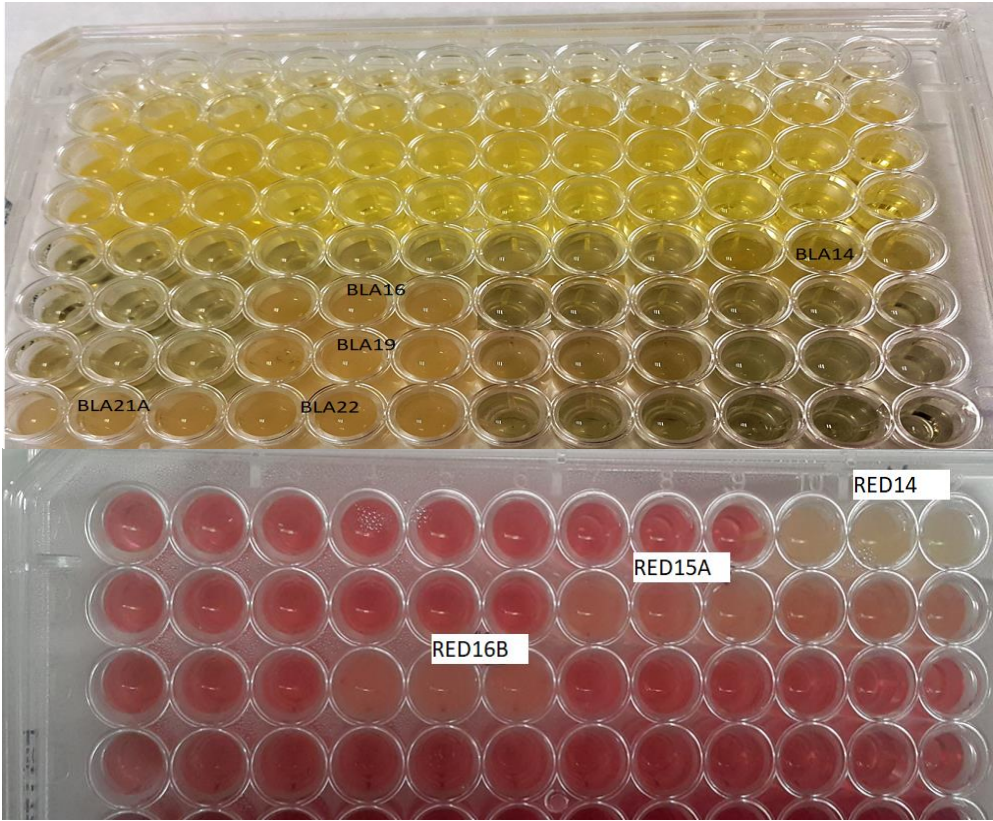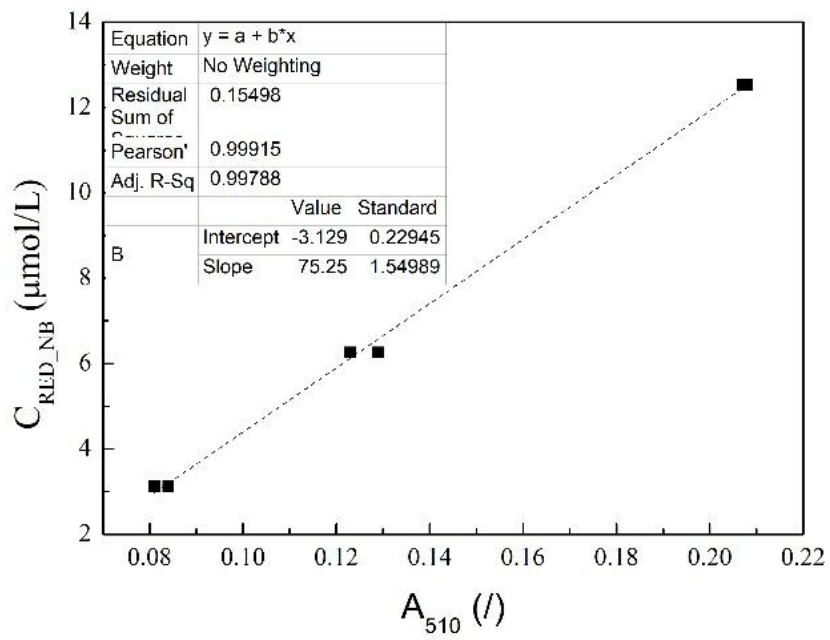

(C)

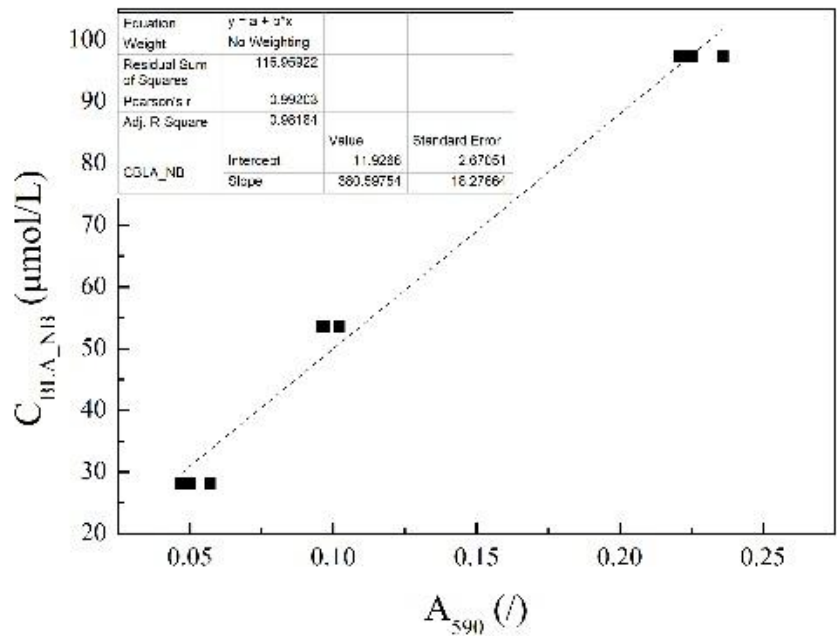

(D)

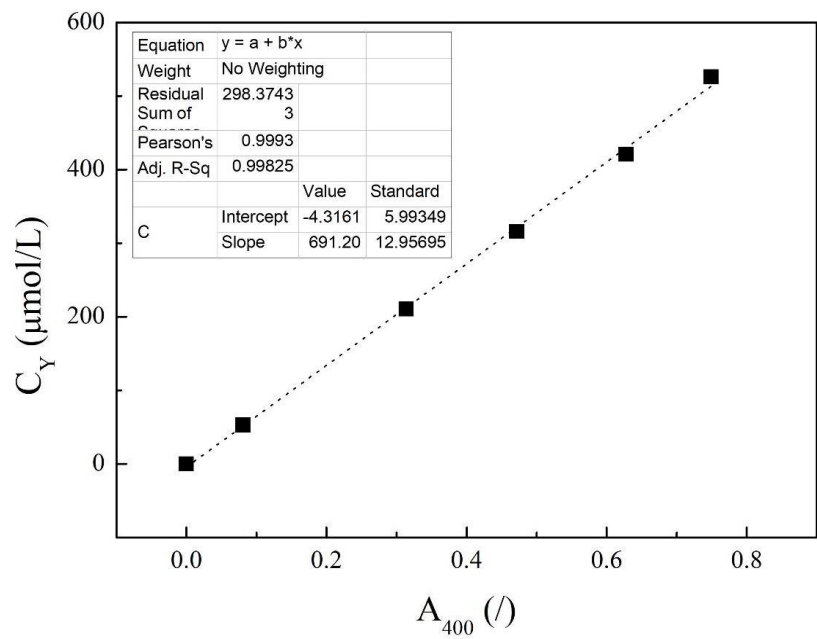

(E)

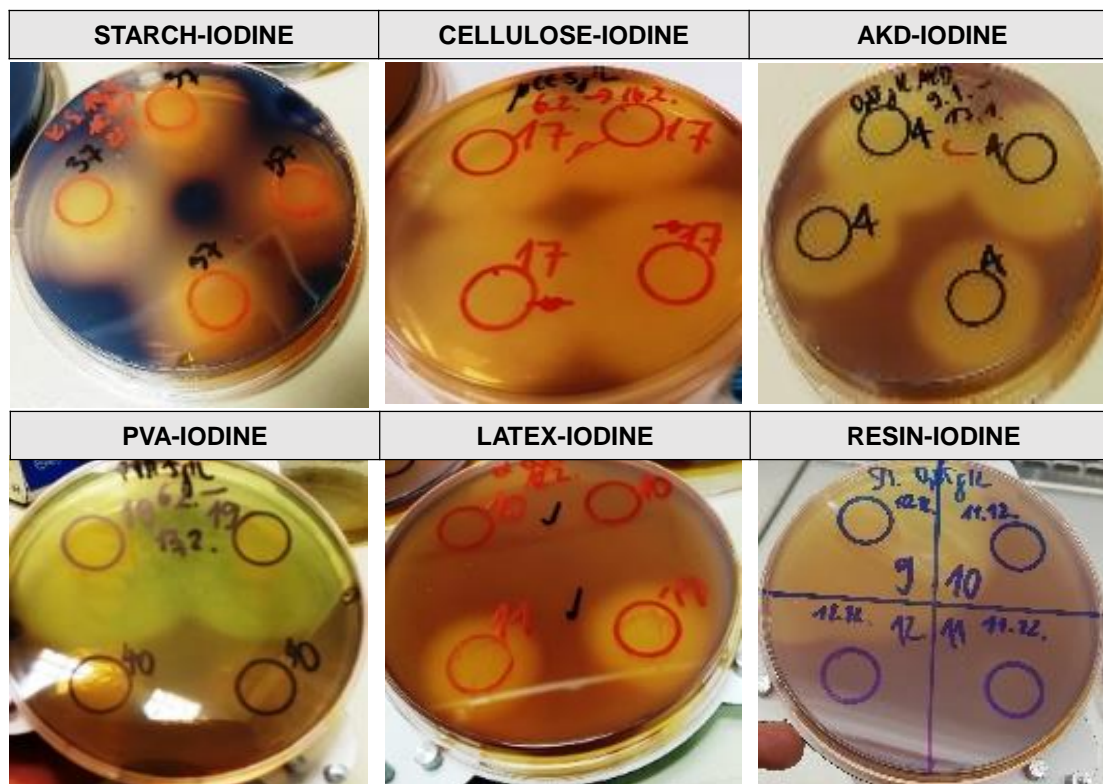

**Supplementary Figure A.1.** Biodegradation assays: (A) above: incubation microtiter plate with 27 BLU isolates in NB with 6 mg/L blue dye, in triplicates, after 18 h at 25°C, below: calibration curve with  $R^2=0.995$ ; (B) above: incubation microtiter plate with 12 RED isolates in NB with 15 mg/L red dye, in triplicates, after 48 h at 25°C, below: calibration curve with  $R^2=0.999$ ; (C) above: microtiter plate rows E-H: 14 BLA isolates in NB with 57 mg/L black dye, in triplicates, after 66 h at 25°C, below: calibration curve for black dye in NB with  $R^2=0.993$ ; (D) calibration curve of yellow dye with  $R^2=0.999$ ; (E) images of M9 agar CST, CE, AKD, PVA, LX and RES after 7-13 days incubation at 25°C without corrections. Above from left to right: Starch-iodine complex formation and distinct discoloring around colonies of CST37, cellulose-iodine complex and distinct discoloring around CE17, AKD-iodine complex and distinct discoloring around AKD4; below from left to right: PVA-iodine complex and distinct discoloring around PVA19 compared to the inactivity of PVA10, LX-iodine complex and distinct discoloration around LX11 compared to the inactivity of LX10 and RES-iodine complex formation and distinct discoloration around RES9 compared to the inactivity of RES10, RES11, RES12.



(A)

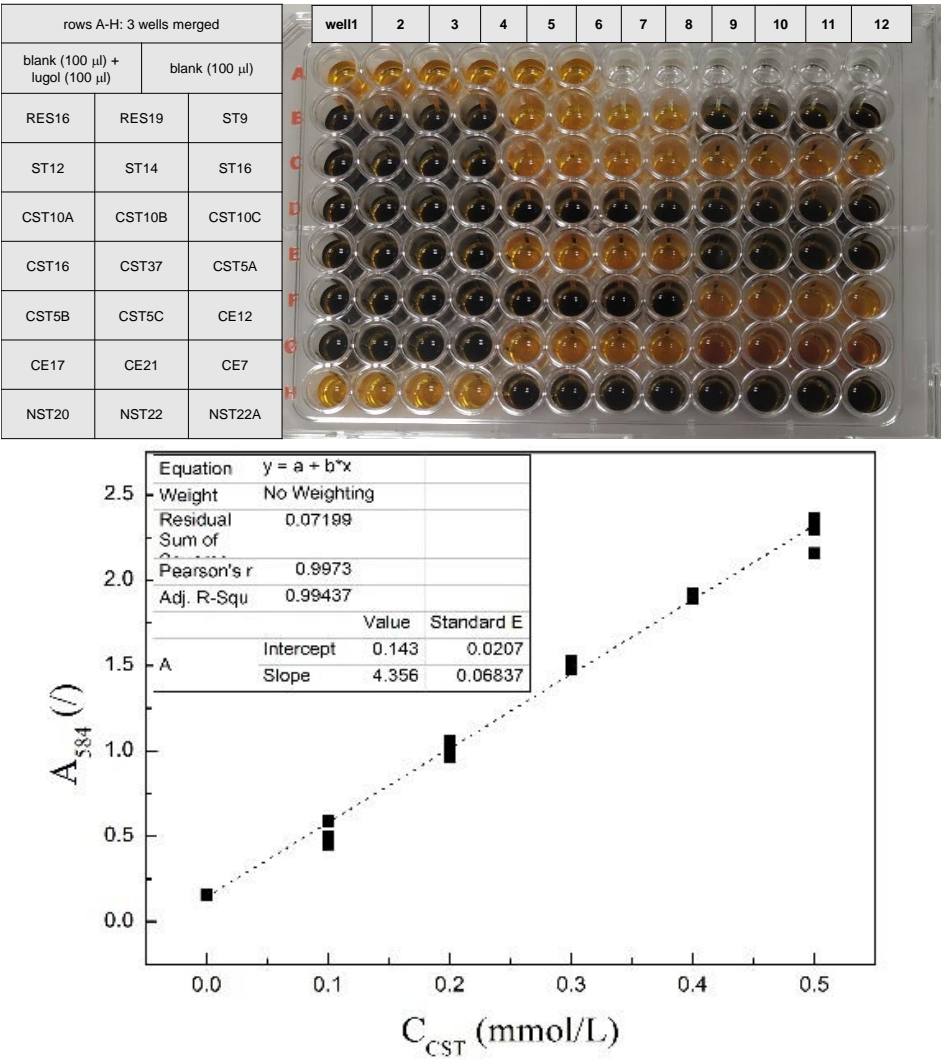

(B)

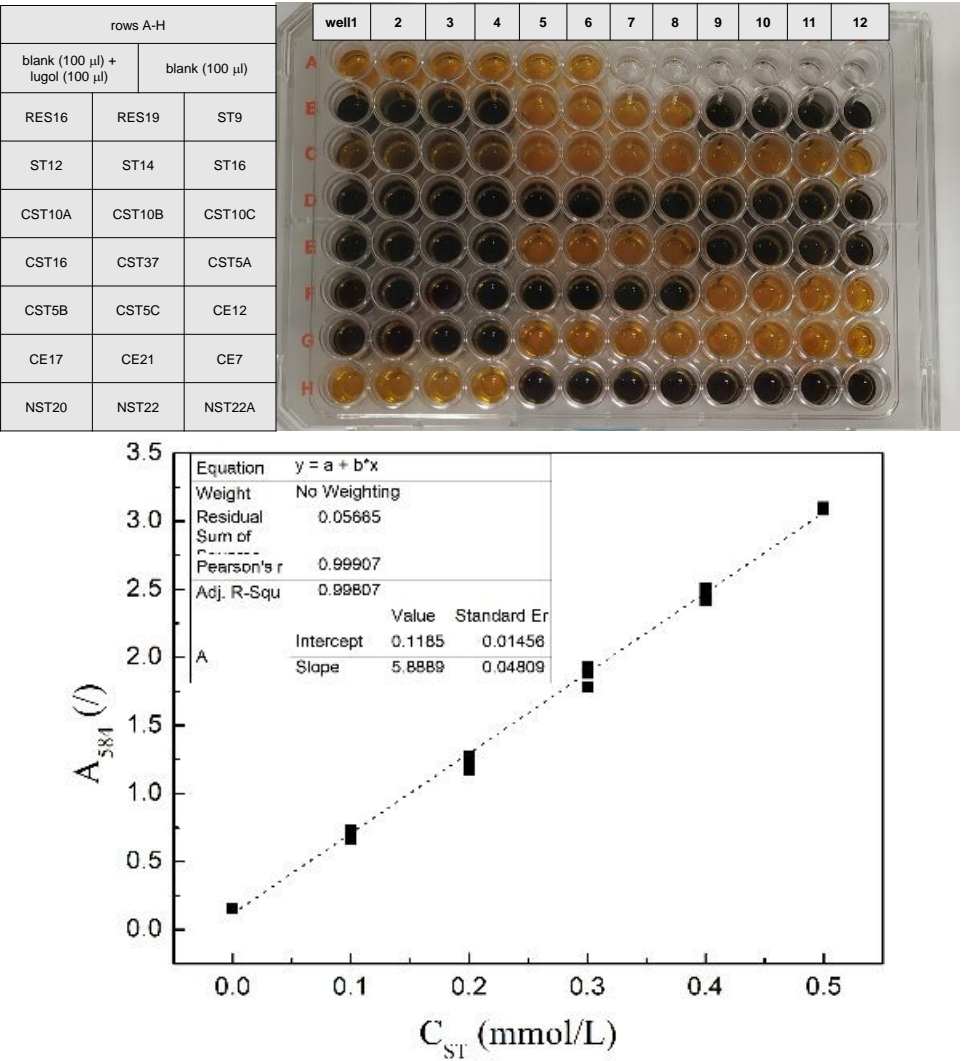

(C)

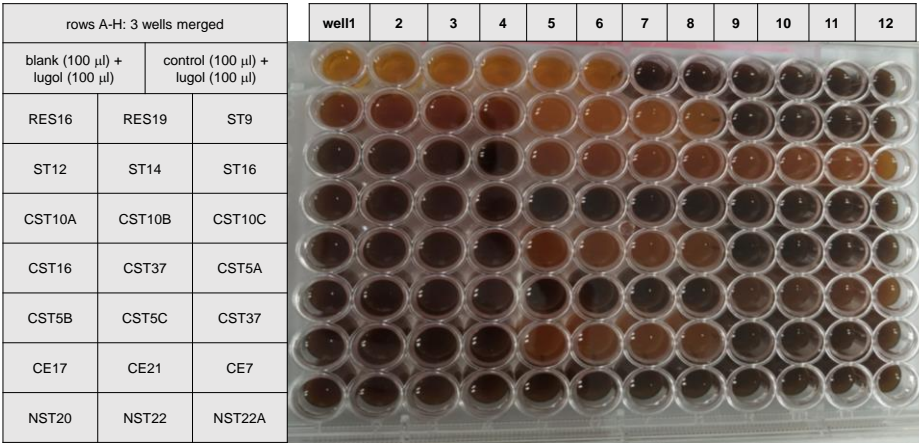

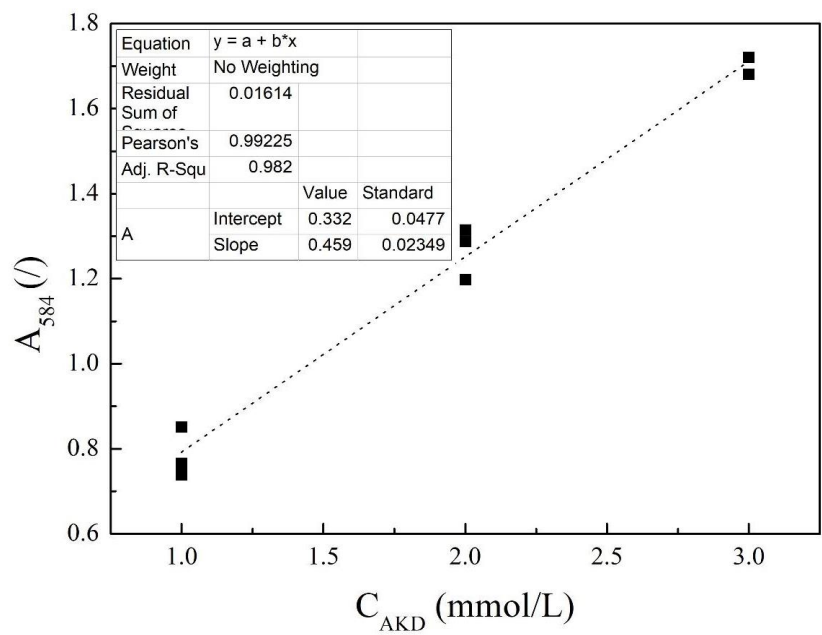

(D)

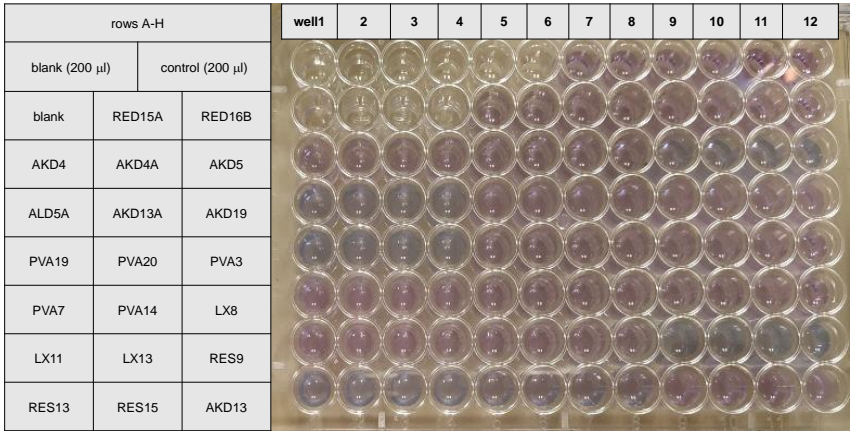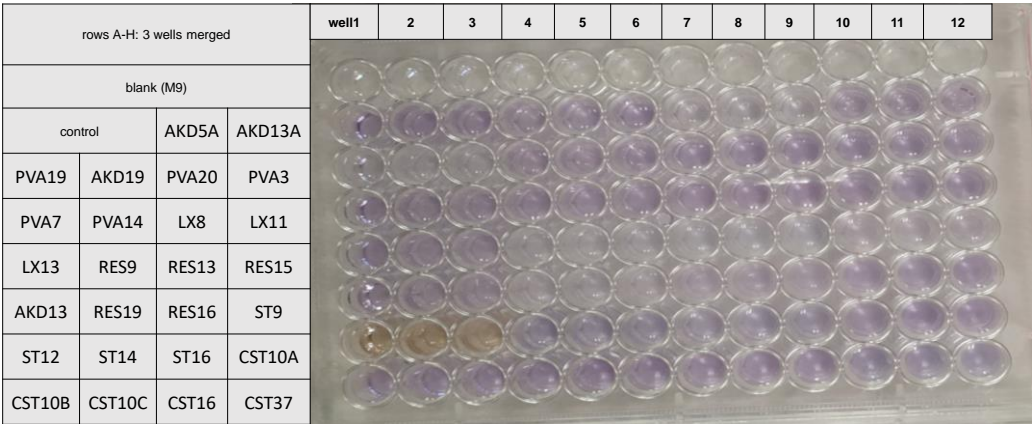



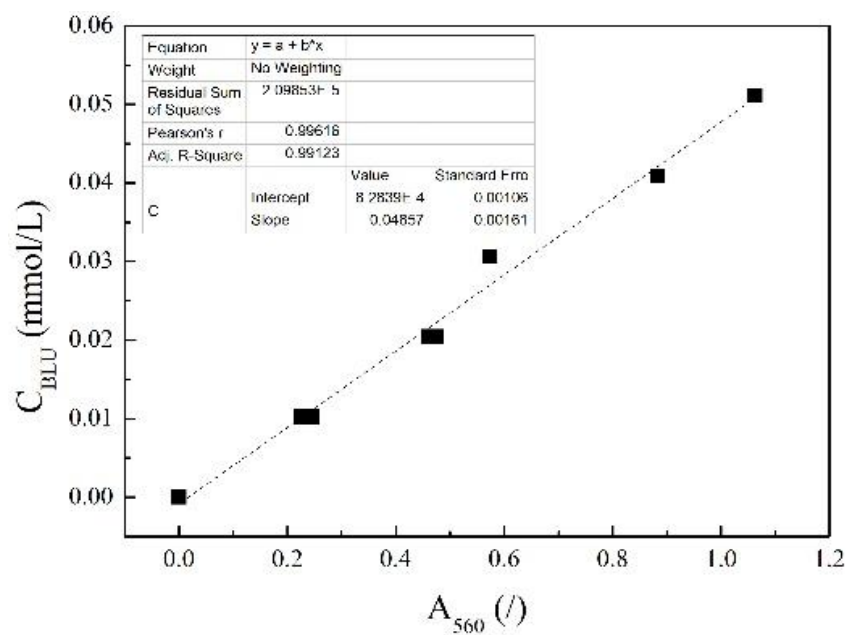

(E)

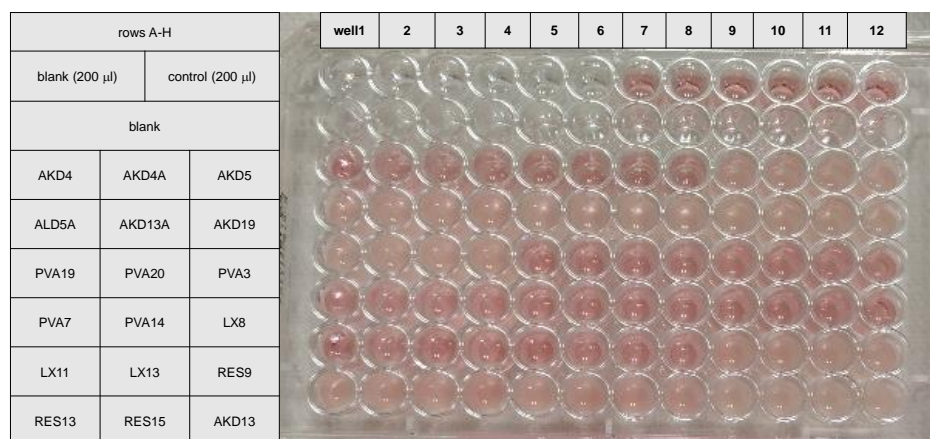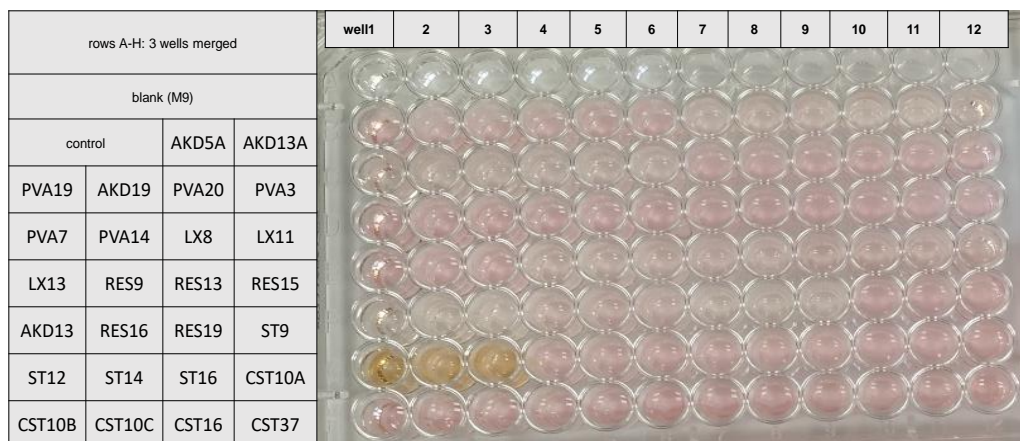

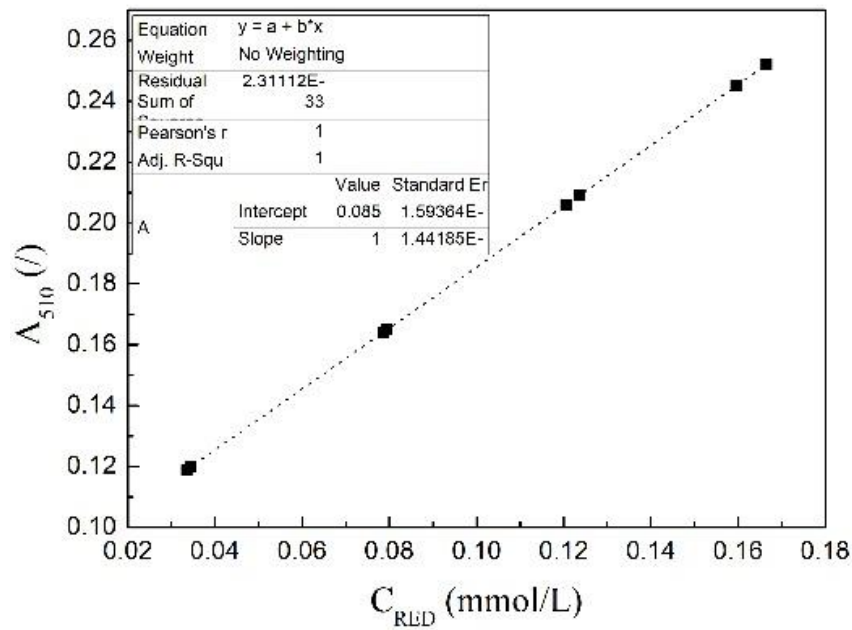

(F)

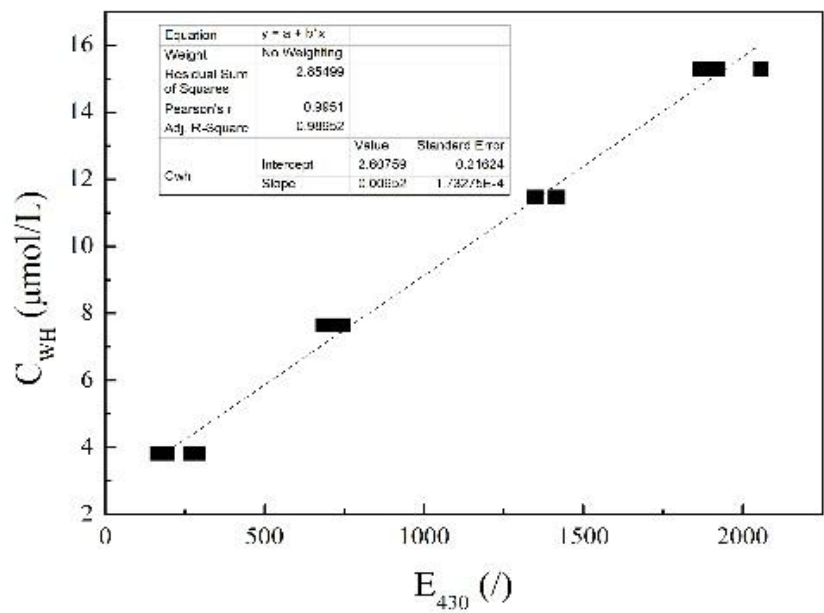

(G)

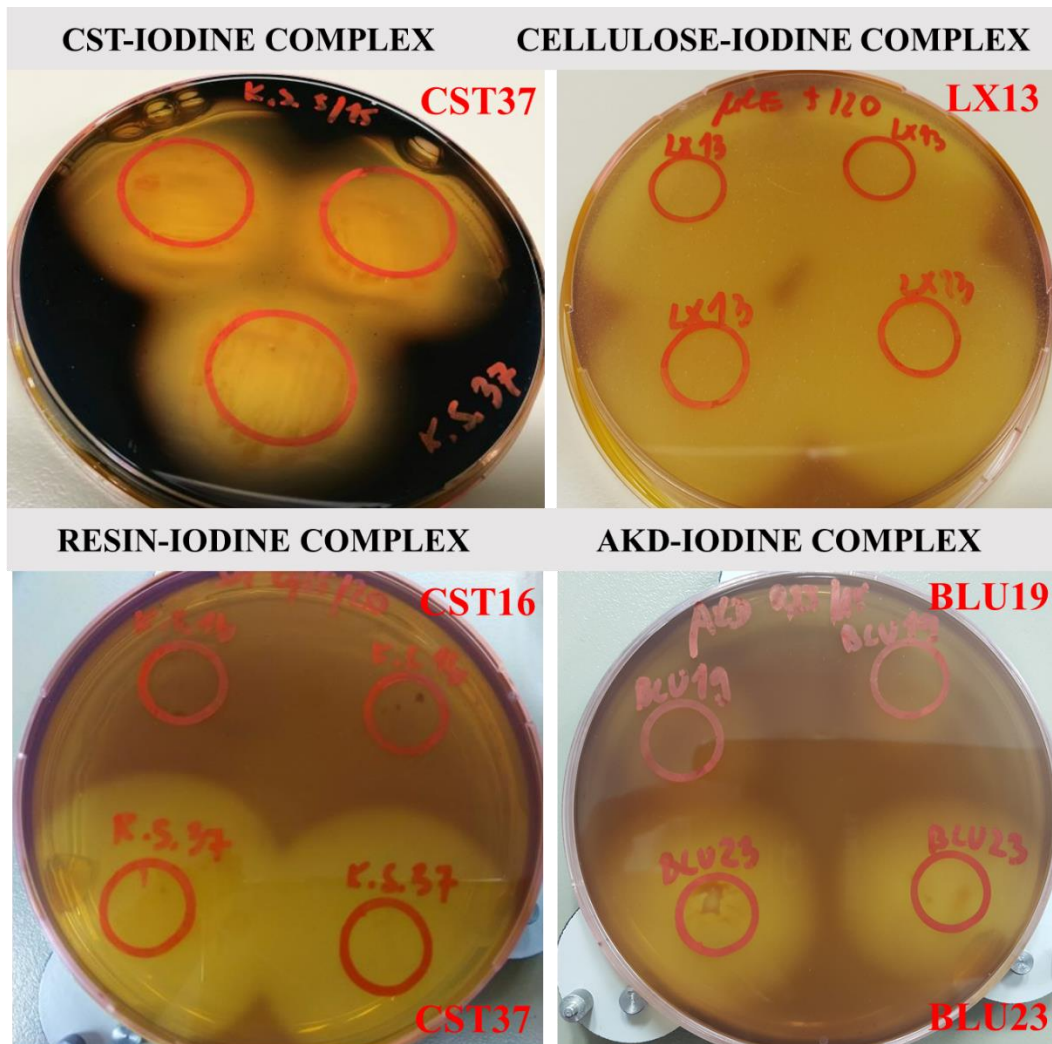

**Supplementary Figure A.2.** Tests for reservoir of carbon source usage. (A) M9 0.5 g/L CST: above: microtiter plate after addition of Lugol, below: calibration curve ( $R^2=0.997$ ); (B) M9 0.5 g/L ST: above: microtiter plate after addition of Lugol, below: calibration curve ( $R^2=0.999$ ); (C) M9 4 g/L AKD: above: microtiter plate after addition of Lugol, below: calibration curve ( $R^2=0.999$ ); (D) BLU in M9<sub>Glc</sub>: above: microtiter plate after 4 days at 25°C, middle: supernatants, below: calibration curve ( $R^2=0.996$ ); (E) RED in M9<sub>Glc</sub>: above: microtiter plate after 4 days at 25°C, middle: supernatants, below: calibration curve ( $R^2=0.999$ ); (F) WH in M9<sub>Glc</sub> calibration curve ( $R^2=0.996$ ); (G) above from left to right: Cationic starch-iodine complex formation after addition of Lugol and distinct discoloration around CST37. Cellulose-iodine complex formation and discoloration due to activities of LX13. Below from left to right: Resin-iodine formation and distinctive discoloration around colonies of CST37 in comparison to inactivity of CST16. AKD-iodine complex formation and discoloration around colonies of BLU23 in comparison to only slight activity of BLU19.

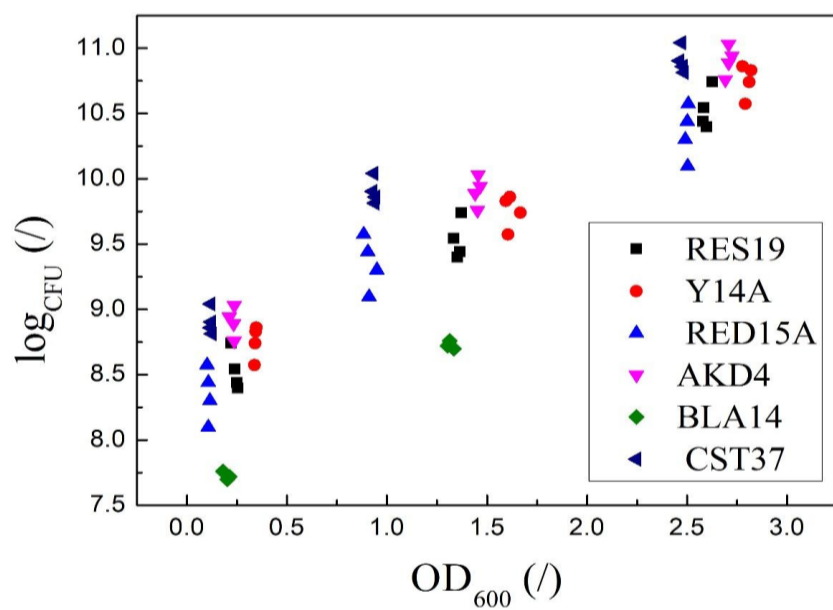

**Supplementary Figure A.3.** Calibration of the growth of the 6 selected bacteria;  $\log(\text{CFU})$  vs.  $\text{OD}_{600}$ .

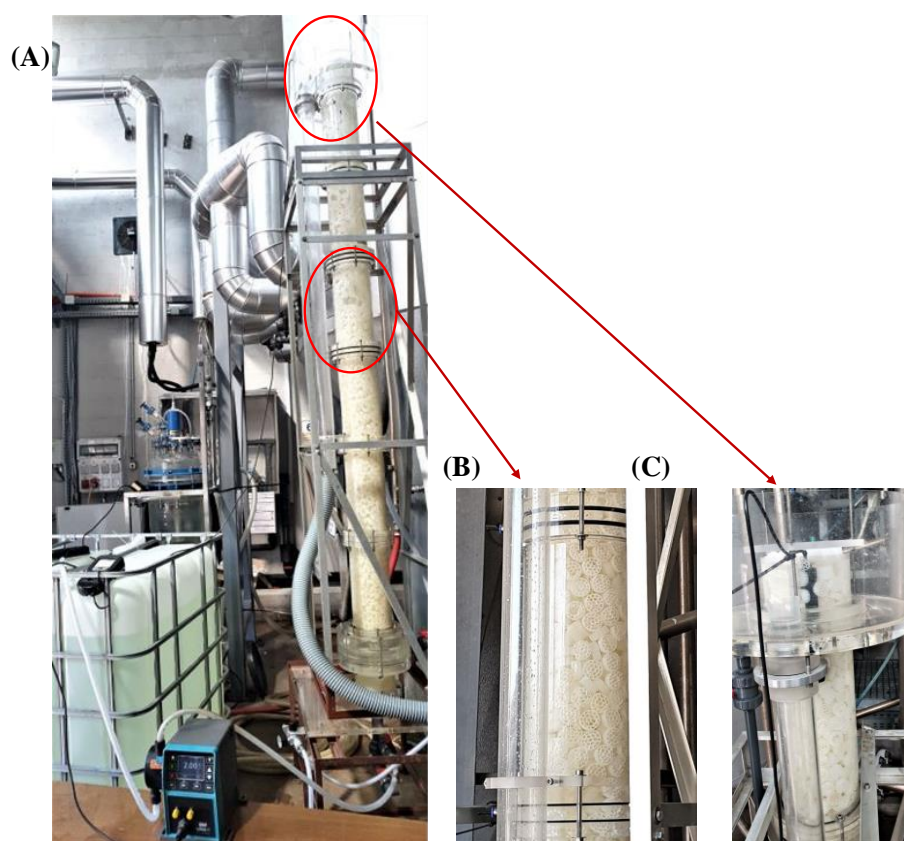

(D)

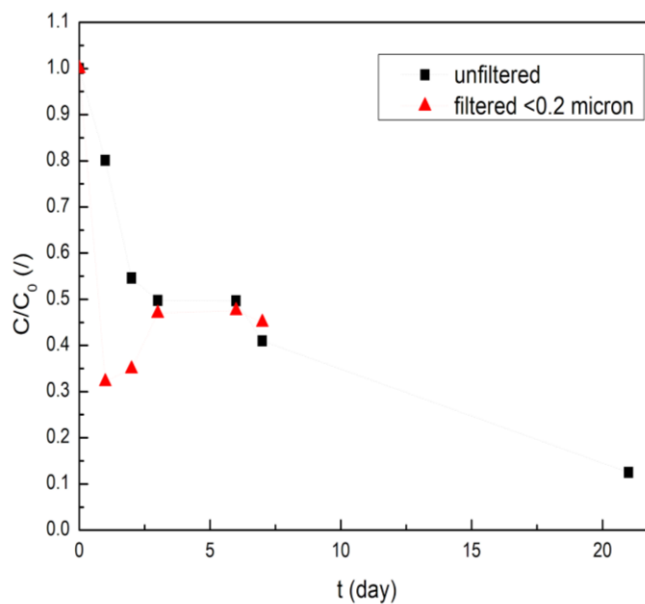

(E)

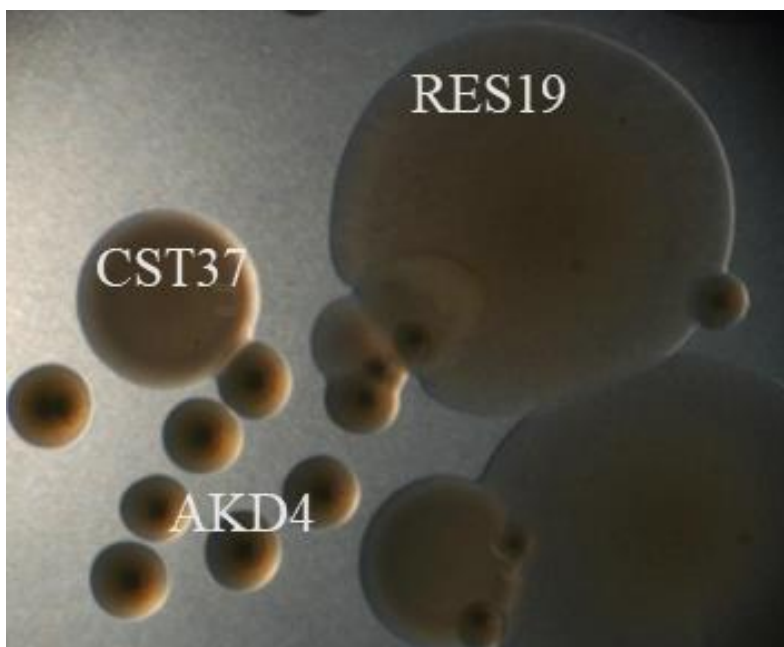

**Supplementary Figure A.4.** Pilot test (for proof of concept only): (A) Photograph of the set-up: a 33 L column with parallel flow of whitewater and air entering at the bottom of the column; (B) part of the column filled with plastic carriers "Kaldens"; (C) upper part of the column with inserted oxygen electrode; (D)  $C/C_0$  from COD measurements of influent and effluent whitewater as a function of time; whitewater samples unfiltered and filtered through 0.2  $\mu\text{m}$  membrane, (E) A representative image of



the colonies obtained with the microscope Motic SMZ-168- BL in a parfocal 6.7:1 zoom. The CFU count was as follows: 3×RES19, 2×CST37 and 13×AKD4.

(A)

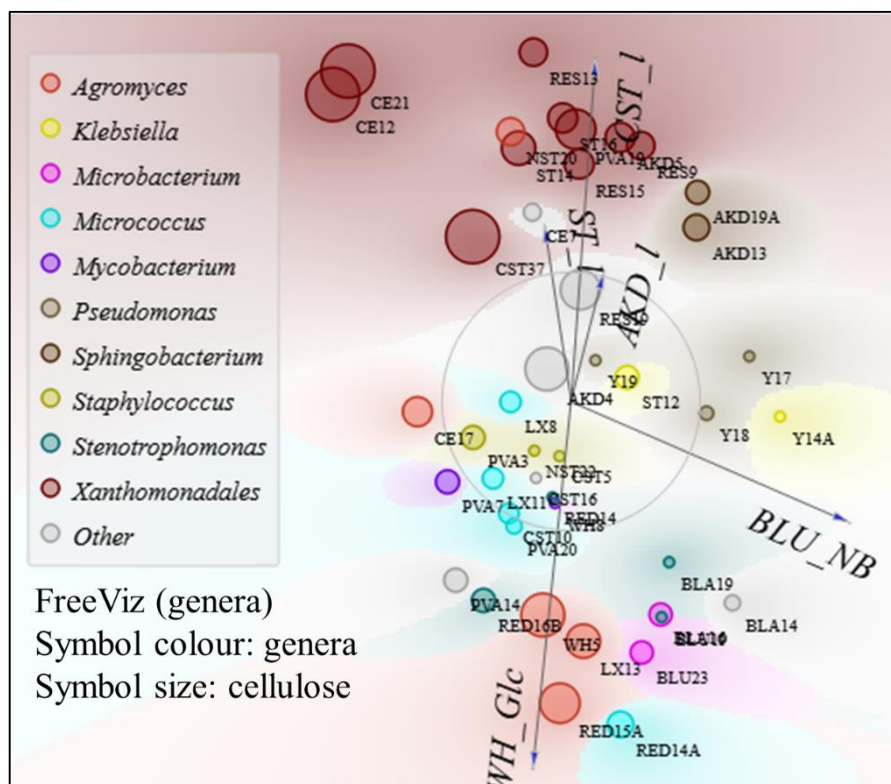

(B)

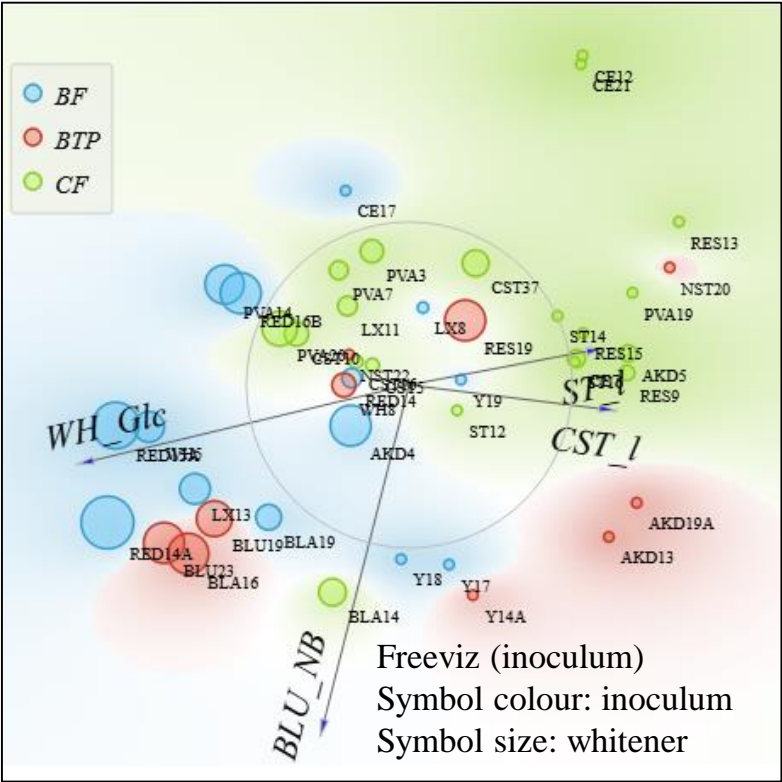

(C)

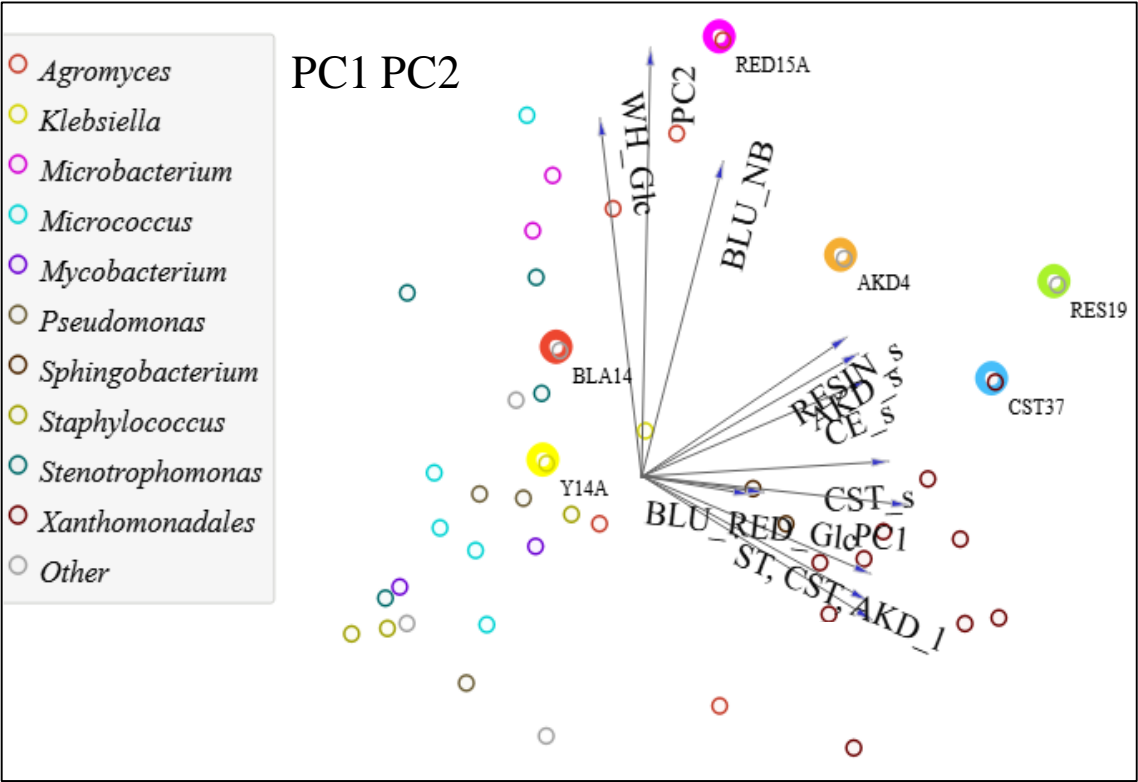

(D)

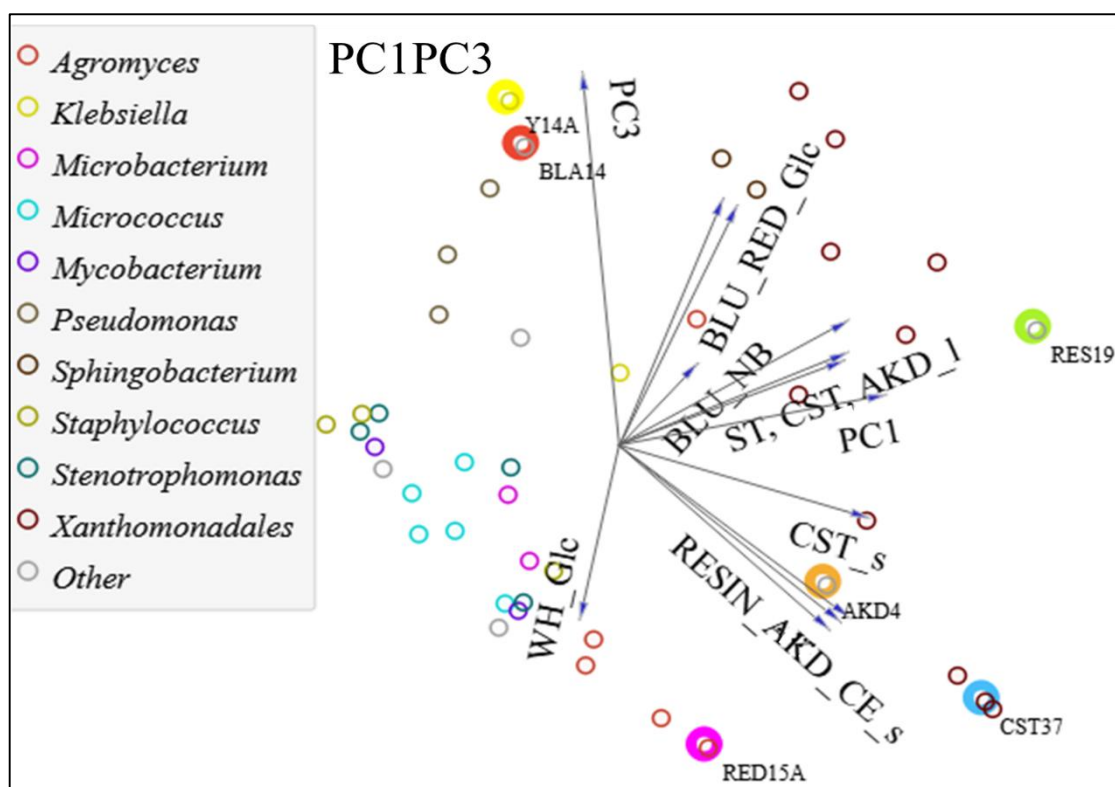

**Supplementary Figure A.5.** FreeViz and PCA of tests for the repertoire of carbon sources of 44 isolates in liquid and solid media. FreeViz projection with (A) clusters of genera and symbol size for cellulose and (B) clusters of inoculum and symbol size for whitener degradation, PCA with clusters for genera and marked 6 selected strains, RED15A (circled in pink), BLA14 (blue), Y14A (yellow), RES19 (green), AKD4 (brown) and CST37 (red): (C) PC1PC2 with 67% and (D) PC1PC3 with 65% explained variances.



(A)

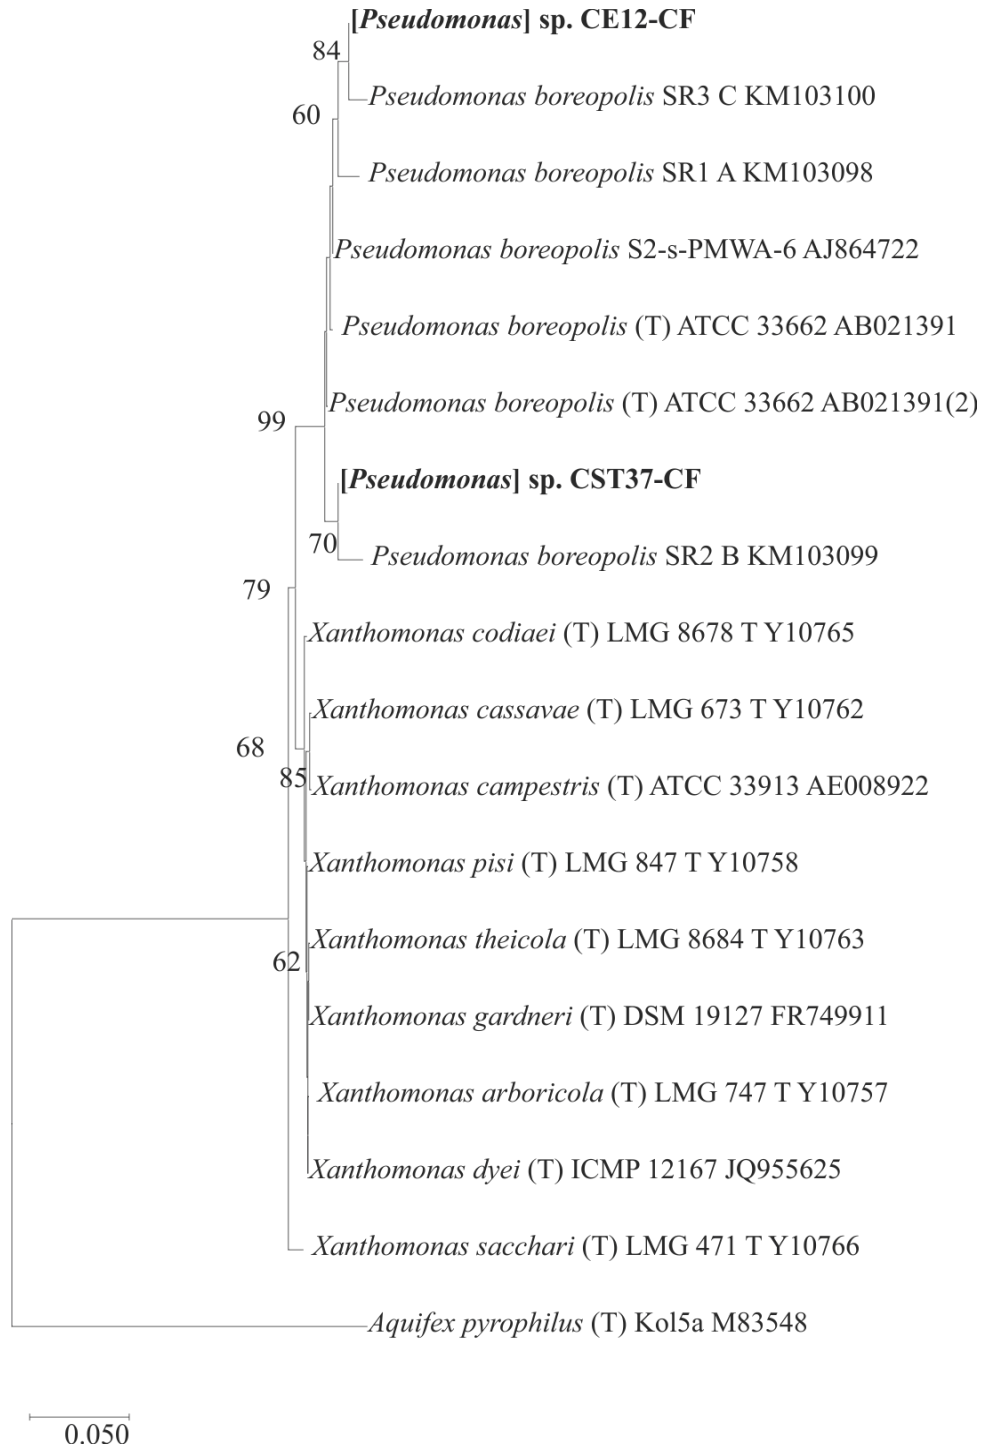

(B)

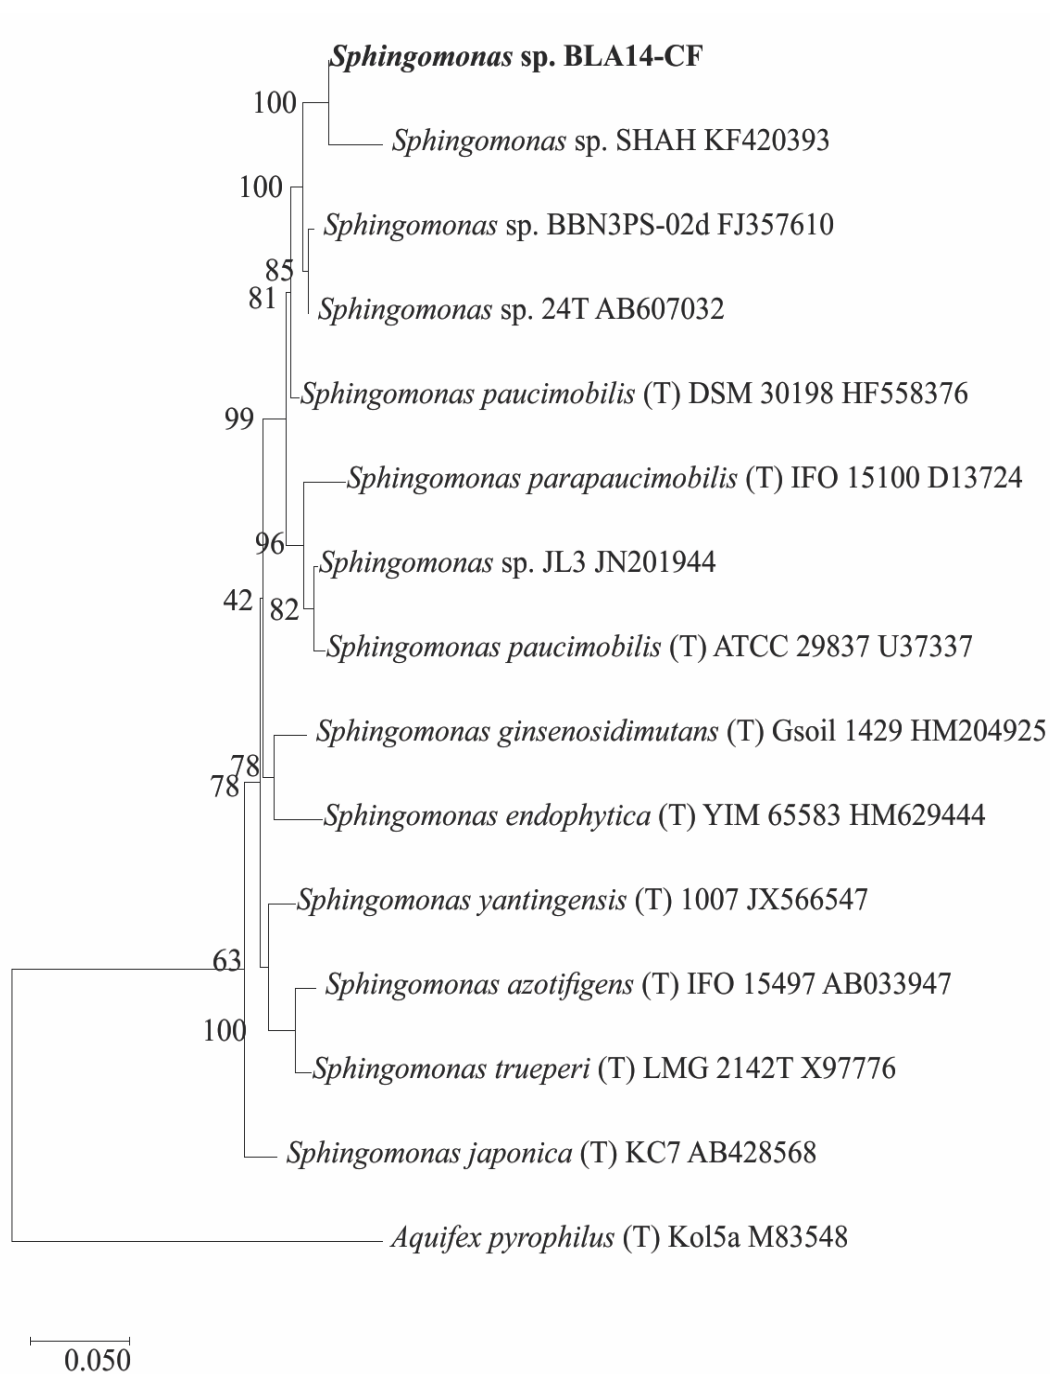

(C)

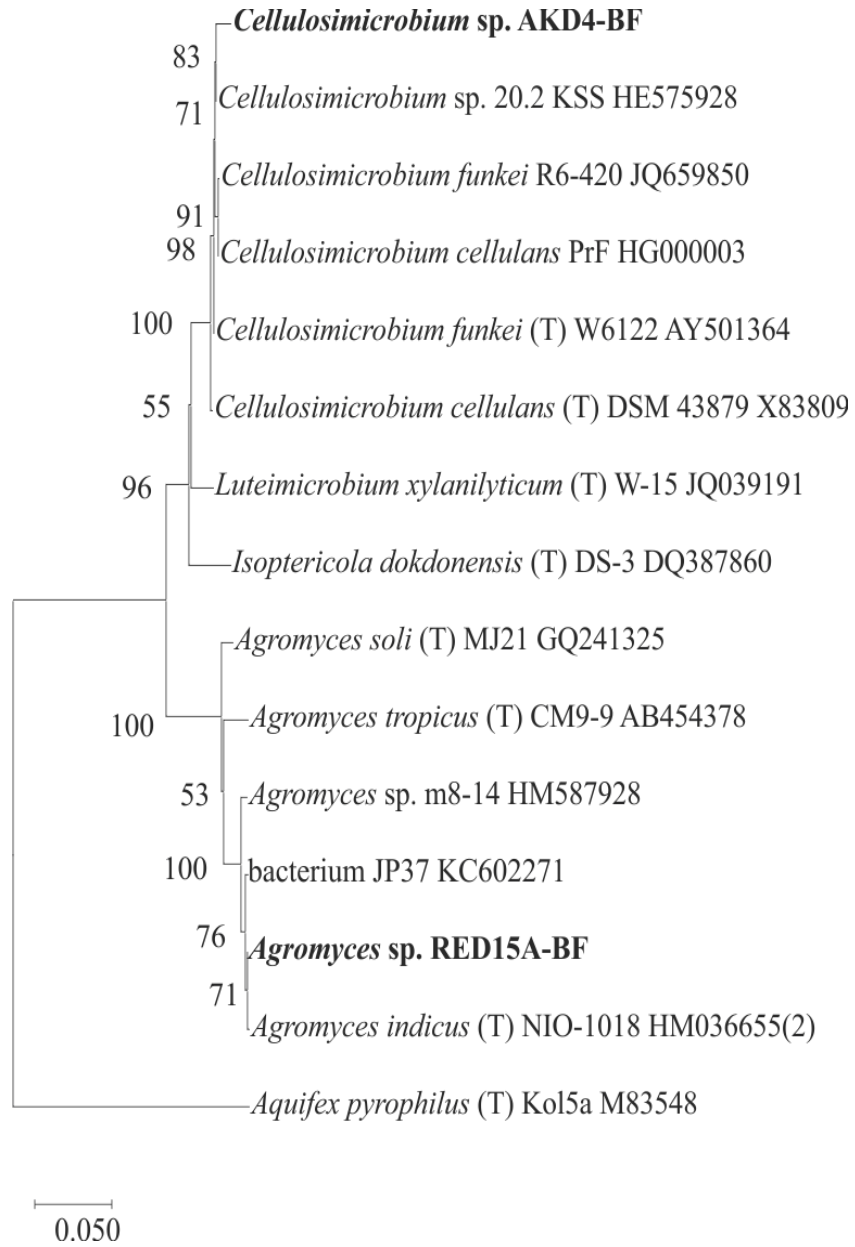

(D)

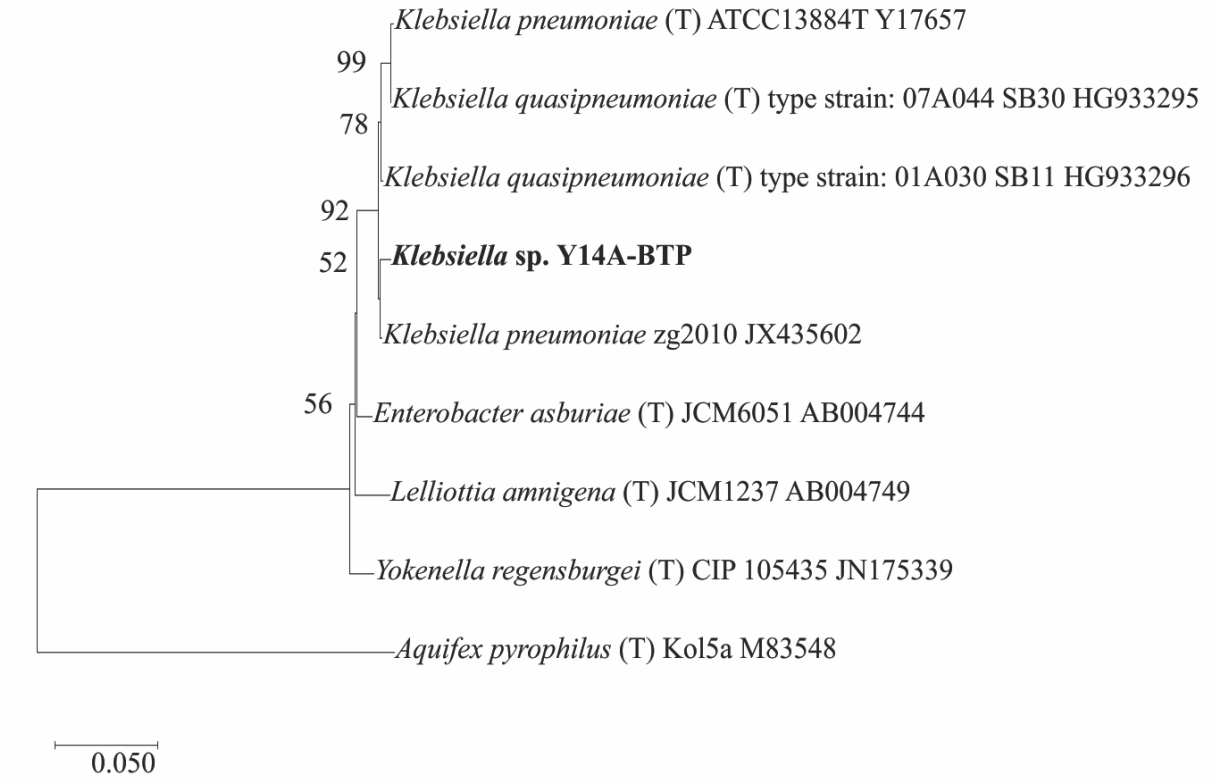

(E)

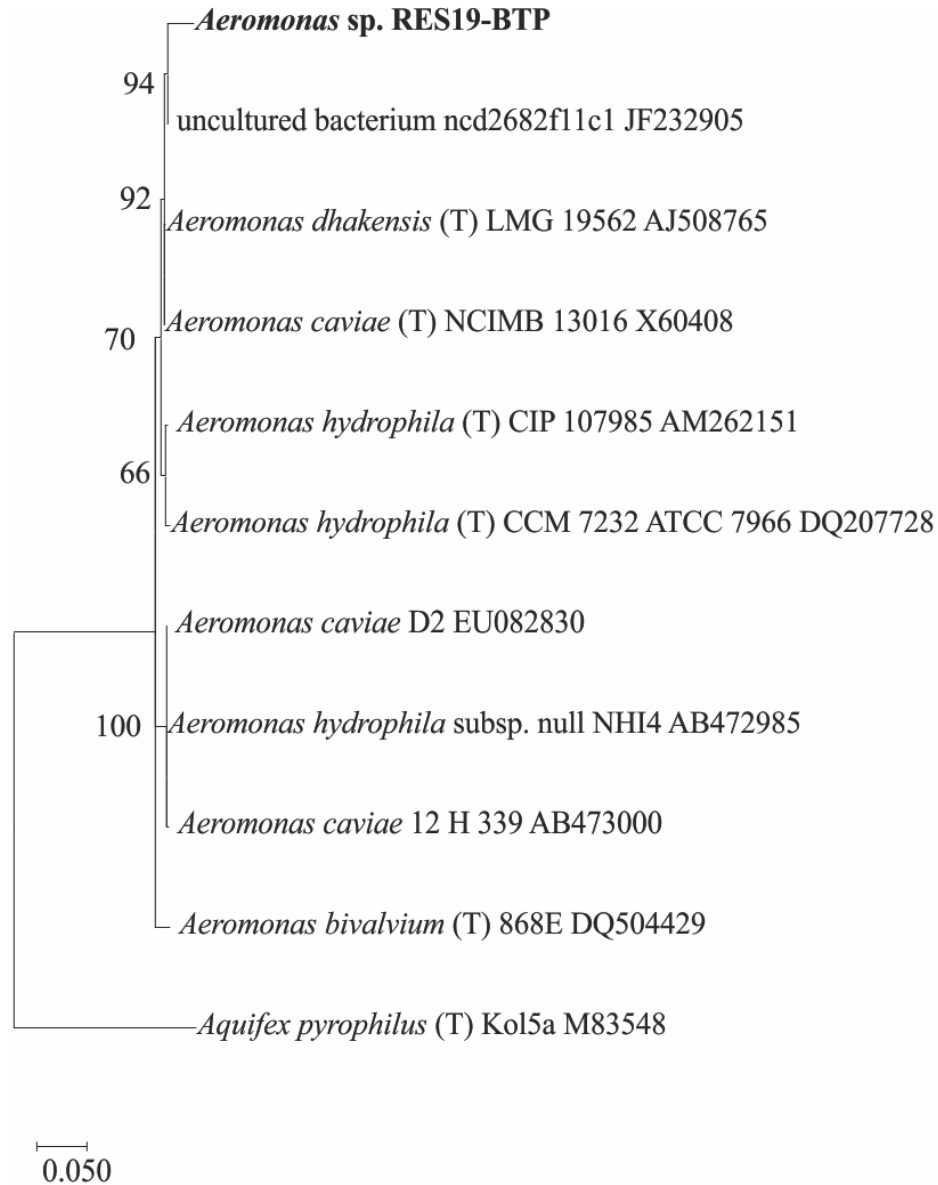

**Supplementary Figure A.6.** Detailed phylogenetic trees displaying the phylogenetic position of six selected isolates with their closest neighbors are presented. *Aquifex pyrophilus* (T) was used as an outlier. Numbers indicate the percentages of bootstrap support, derived from 1000 re-samplings. The evolutionary history was derived using the Neighbor-Joining method (Saitou and Nei, 1987). (A) Xanthomonadales bacterium strain CST37, (B) *Sphingomonas* sp. strain BLA14-CF, (C) *Cellulosimicrobium* sp. strain AKD4-BF together with *Agromyces* sp. strain RED15A, (D) *Klebsiella* sp. strain Y14A-BTP and (E) *Aeromonas* sp. RES19-BTP.
